# Supplementary material
Source: PubMed Central journal article supplement (PMC3983832)
Supplement: supp_the2014-0028_Tabernero-14-28.pdf [file supp_the2014-0028_Tabernero-14-28.pdf]

## Overview

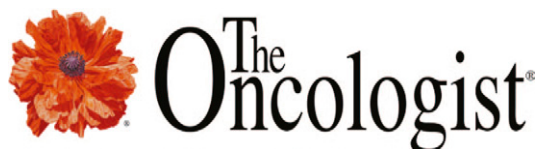

The official journal of the Society for Translational Oncology

**First Published Online March 27, 2014**

**DOI:** 10.1634/theoncologist.2014-0028

**Title:** An Open-Label Phase II Study Evaluating the Safety and Efficacy of Ramucirumab Combined With mFOLFOX-6 as First-Line Therapy for Metastatic Colorectal Cancer

**Authors:** Rocio Garcia-Carbonero,<sup>a</sup> Fernando Rivera,<sup>b</sup> Joan Maurel,<sup>c</sup> Jean-Pierre M. Ayoub,<sup>d</sup> Malcolm J. Moore,<sup>e</sup> Andres Cervantes,<sup>f</sup> Timothy R. Asmis,<sup>g</sup> Jonathan D. Schwartz,<sup>h</sup> Federico Nasroulah,<sup>h</sup> Shaila Ballal,<sup>h</sup> Josep Taberero<sup>i</sup>

<sup>a</sup>Hospital Universitario Virgen del Rocío, Instituto de Biomedicina de Sevilla (center affiliated with the Red Temática de Investigación Cooperativa en Cancer, Instituto Carlos III, Spanish Ministry of Science and Innovation), Sevilla, Spain; <sup>b</sup>Hospital Universitario Marqués de Valdecilla, Santander, Spain; <sup>c</sup>Hospital Clinic i Provincial, Barcelona, Spain; <sup>d</sup>Centre Hospitalier de l'Université de Montréal, Montréal, Quebec, Canada; <sup>e</sup>Princess Margaret Hospital and University of Toronto, Toronto, Ontario, Canada; <sup>f</sup>Department of Hematology and Medical Oncology, Biomedical Research Institute INCLIVA, University of Valencia, Valencia, Spain; <sup>g</sup>The Ottawa Hospital, Ottawa, Ontario, Canada; <sup>h</sup>ImClone Systems (a wholly-owned subsidiary of Eli Lilly and Company), Bridgewater, New Jersey, USA; <sup>i</sup>Vall d'Hebron University Hospital and Institute of Oncology, Universitat Autònoma de Barcelona (center affiliated with the Red Temática de Investigación Cooperativa en Cancer, Instituto Carlos III, Spanish Ministry of Science and Innovation), Barcelona, Spain

**ClinicalTrials.gov Identifier:** NCT00862784

**Sponsor(s):** Eli Lilly and Company

**Principal Investigator:** Rocio Garcia-Carbonero

**IRB Approved:** Yes

### Disclosures

**Fernando Rivera:** Roche, Amgen, Celgene, Sanofi, Bayer (C/A); Roche, Amgen, Sanofi, Imclon, Bayer (RF); **Malcolm J. Moore:** Imclone (RF); **Timothy R. Asmis:** Sanofi, Lilly (C/A, RF); **Jonathan D. Schwartz:** Imclone/Lilly (E, OI); **Federico Nasroulah:** Eli Lilly and Company (E); **Shaila Ballal:** ImClone, Lilly (E, OI); **Josep Taberero:** Lilly, Imclone (C/A). The other authors indicated no financial relationships.

(C/A) Consulting/advisory relationship; (RF) Research funding; (E) Employment; (ET) Expert testimony; (H) Honoraria received; (OI) Ownership interests; (IP) Intellectual property rights/inventor/patent holder; (SAB) Scientific advisory board

## Author Summary: Abstract and Brief Discussion

### Background

Vascular endothelial growth factor (VEGF) and VEGF receptor 2 (VEGFR-2) are believed to mediate angiogenesis in colorectal cancer (CRC). Ramucirumab (RAM; IMC-1121B) is a human IgG1 monoclonal antibody that inhibits VEGF ligand binding to VEGFR-2, inhibiting VEGFR-2 activation and signaling.

### Methods

Patients with metastatic CRC, Eastern Cooperative Oncology Group performance status 0–1, and adequate organ function who had not received chemotherapy for metastatic disease received RAM and the modified FOLFOX-6 regimen every 2 weeks. Endpoints included progression-free survival (PFS), objective response rate, overall survival, and safety. The sample size was based on a potentially improved median PFS from 8 months to 11 months.

## Results

Forty-eight patients received therapy. Median PFS was 11.5 months (95% confidence interval [CI]: 8.6–13.1 months). The objective response rate was 58.3% (95% CI: 43.21–72.39). The disease control rate (complete or partial response plus stable disease) was 93.8% (95% CI: 82.8–98.7). Median overall survival was 20.4 months (95% CI: 18.5–25.1 months). The most frequent grade 3–4 adverse events included neutropenia (grade 3: 33.3%; grade 4: 8.3%), hypertension (grade 3: 16.7%), and neuropathy (grade 3: 12.5%). Two patients died during the study due to myocardial infarction and cardiopulmonary arrest.

## Conclusion

RAM may enhance the efficacy of modified FOLFOX-6 chemotherapy with an acceptable safety profile in metastatic CRC.

## Discussion

The combination of ramucirumab (RAM) and the modified FOLFOX-6 regimen (mFOLFOX-6) appears efficacious in the first-line treatment of patients with metastatic colorectal cancer (mCRC). The median progression-free survival (PFS) of 11.5 months (Fig. 1), an objective response rate of 58.3%, a disease control rate of 93.8% (stable disease defined as neither shrinkage sufficient to qualify for partial response nor increase sufficient to qualify for progressive disease, taking as a reference the smallest sum longest diameter since the start of treatment), and median overall survival (OS) of 20.4 months are encouraging and suggest that RAM may enhance the efficacy of mFOLFOX-6 in mCRC. Figure 2 shows that the majority of the study population experienced some tumor burden reduction, including patients with liver-only disease and those with more extensive patterns of metastases. Although many patients discontinued oxaliplatin after 5–8 months of therapy, 23% continued to receive RAM and 5-fluorouracil with ongoing disease control for more than 5 months after discontinuation of oxaliplatin. The median OS was 20.4 months.

The incidence of most adverse events in patients receiving RAM and mFOLFOX-6 was consistent with the known adverse event profile of mFOLFOX-6 in mCRC [1–6]. Hypertension (including 16.7% at grade 3 and no grade 4) and proteinuria (12.5% at grade 2 and one grade 4 nephrotic syndrome) were observed. Two patients experienced grade 5 potential arterial thromboembolic events (myocardial infarction and cardiopulmonary arrest), and three patients had grade 3–4 venous thromboembolic events (pulmonary embolism, deep vein thrombosis, jugular vein thrombosis).

Exploratory pharmacokinetic, pharmacodynamic, and correlative analyses were conducted in samples collected from nine patients. Mean trough levels after repeated dosing of 8 mg/kg of RAM every 2 weeks exceeded concentrations associated with antitumor activity in preclinical models. Higher baseline levels of soluble Flt-1 (soluble VEGFR-1) and VEGF-A and lower baseline levels of VEGF-D appeared to be associated with longer PFS and OS. Because this was a single-arm trial, no conclusions can be drawn regarding whether these potential associations are prognostic or predictive. Conclusions are also limited by the sample size and should be considered hypothesis generating.

In conclusion, RAM may enhance the efficacy of mFOLFOX-6 in mCRC. The overall adverse event profile of the combination appears to be largely consistent with the toxicity profile of the constituent chemotherapeutic agents and the known safety profile of RAM to date. However, the modest sample size and the single-arm design of the study preclude definitive assessment regarding these conclusions.

## Trial Information

|                                                         |                                                                                                |
|---------------------------------------------------------|------------------------------------------------------------------------------------------------|
| <b>Disease:</b>                                         | Colorectal cancer                                                                              |
| <b>Stage of disease / treatment:</b>                    | Metastatic / Advanced                                                                          |
| <b>Prior Therapy:</b>                                   | None                                                                                           |
| <b>Type of study - 1:</b>                               | Phase II                                                                                       |
| <b>Type of study - 2:</b>                               | Single Arm                                                                                     |
| <b>Primary Endpoint:</b>                                | Progression Free Survival                                                                      |
| <b>Secondary Endpoint:</b>                              | Overall Response Rate                                                                          |
| <b>Secondary Endpoint:</b>                              | Overall Survival                                                                               |
| <b>Secondary Endpoint:</b>                              | Correlative Endpoint                                                                           |
| <b>Additional Details of Endpoints or Study Design:</b> | Additional secondary endpoints: Safety, duration of response, pharmacokinetics, immunogenicity |
| <b>Investigator's Analysis:</b>                         | Active and should be pursued further.                                                          |

## Drug Information

|                                    |                                                                                                                                                                                                                                                                                                                                            |
|------------------------------------|--------------------------------------------------------------------------------------------------------------------------------------------------------------------------------------------------------------------------------------------------------------------------------------------------------------------------------------------|
| <b>Drug 1:</b>                     |                                                                                                                                                                                                                                                                                                                                            |
| <b>Generic/Working name:</b>       | Ramucirumab                                                                                                                                                                                                                                                                                                                                |
| <b>Company name:</b>               | Eli Lilly and Company                                                                                                                                                                                                                                                                                                                      |
| <b>Drug type:</b>                  | Antibody                                                                                                                                                                                                                                                                                                                                   |
| <b>Drug class:</b>                 | VEGFR                                                                                                                                                                                                                                                                                                                                      |
| <b>Dose:</b>                       | 8 mg (mg) per kilogram (kg)                                                                                                                                                                                                                                                                                                                |
| <b>Route:</b>                      | IV                                                                                                                                                                                                                                                                                                                                         |
| <b>Schedule of Administration:</b> | Ramucirumab + mFOLFOX-6 every 2 weeks<br>Ramucirumab 8 mg/kg iv<br>Oxaliplatin 85 mg/m <sup>2</sup> iv d1<br>Folinic acid 400 mg/m <sup>2</sup> iv d1 (2 hour infusion)<br>5-Fluorouracil 400 mg/m <sup>2</sup> iv d1 (2-4 minutes bolus infusion)<br>5-Fluorouracil 2,400 mg/m <sup>2</sup> iv 46 h immediately following bolus d1 and d2 |

## Patient Characteristics

|                                     |                                                     |
|-------------------------------------|-----------------------------------------------------|
| Number of patients, male:           | 25                                                  |
| Number of patients, female:         | 23                                                  |
| Stage:                              | Not Collected                                       |
| Age:                                | Median (range): 60.5 (28–81)                        |
| Number of prior systemic therapies: | Median (range): Not Collected                       |
| Performance Status:                 | ECOG<br>0 — 30<br>1 — 18<br>2 —<br>3 —<br>unknown — |
| Other:                              | Not Collected                                       |

## Primary Assessment Method

### Experimental Arm: Total Patient Population

|                                                        |                            |
|--------------------------------------------------------|----------------------------|
| <b>Number of patients enrolled:</b>                    | 48                         |
| <b>Number of patients evaluable for toxicity:</b>      | 48                         |
| <b>Number of patients evaluated for efficacy:</b>      | 48                         |
| <b>Evaluation method:</b>                              | RECIST 1.0                 |
| <b>Response assessment CR:</b>                         | 2.1%                       |
| <b>Response assessment PR:</b>                         | 56.3%                      |
| <b>Response assessment SD:</b>                         | 35.4%                      |
| <b>Response assessment PD:</b>                         | 2.1%                       |
| <b>Response assessment other:</b>                      | 4.2%                       |
| <b>(Median) duration assessments PFS</b>               | 11.5 months, CI: 8.6–13.1  |
| <b>(Median) duration assessments OS</b>                | 20.4 months, CI: 18.5–25.1 |
| <b>(Median) duration assessments response duration</b> | 11.0 months                |

## Assessment, Analysis, and Discussion

|                                             |                                      |
|---------------------------------------------|--------------------------------------|
| <b>Completion:</b>                          | Study completed                      |
| <b>Pharmacokinetics / Pharmacodynamics:</b> | Not collected                        |
| <b>Investigator's Assessment:</b>           | Active and should be pursued further |

### Discussion

Colorectal cancer is the third most common cancer worldwide [7]. Approximately 25% of patients with CRC have metastatic disease at the time of diagnosis; metastases may develop in up to 50% of patients with less advanced disease following potentially curative resection [8]. FOLFOX regimens (a combination of oxaliplatin, 5-fluorouracil, and leucovorin) are one of the standards of care in mCRC and are frequently utilized in first-line treatment with or without the addition of the anti-VEGF-A antibody bevacizumab. Median PFS for first-line FOLFOX is approximately 8 months, as recently reported in phase III evaluations [9, 10]. We hypothesized that the addition of RAM to mFOLFOX-6 would prolong PFS and other efficacy parameters when administered as a first-line regimen in patients with mCRC.

In this open-label, multicenter, multinational phase II trial, previously untreated patients with mCRC received RAM once every 2 weeks in combination with mFOLFOX-6. The primary objective was to evaluate PFS; secondary objectives included evaluation of objective response rate; OS; duration of response; safety; and pharmacokinetic, pharmacodynamic, and immunogenicity profiles of RAM. The sample size was based upon the assumption of uniform accrual over an 8-month period, with a follow-up of 20 months, no loss to follow-up, and a negative exponential distribution for the time to events. A sample size of 45 patients allowed differentiation of an expected increase in median PFS from 8 months (historical control; mFOLFOX-6) to 11 months with the addition of RAM.

All patients had metastatic disease. The liver was the most common site of metastasis (79.2%); 13 patients (27.1%) had liver-only metastases. The majority of patients (68.8%) had undergone previous surgery for colorectal cancer. At the time of enrollment, 45.8% of patients had a medical history of hypertension (Table 1).

The median PFS was 11.5 months (95% confidence interval [CI]: 8.6–13.1) (Fig. 1). The objective response rate was 58.3% (95% CI: 43.21–72.39) (Table 2). The duration of response was measured from the time measurement criteria were first met for complete response or partial response (whichever was first recorded) until the first date that the criteria for progressive disease were met, initiation of other or additional antitumor therapy was first reported, or death was objectively documented. Median duration of response was 11.0 months (95% CI: 6.9–12.6), and the median OS was 20.4 months (95% CI: 18.5–25.1) (Fig. 3).

Although many patients discontinued oxaliplatin treatment after the initial 5–8 months of therapy, a substantial subset continued to receive RAM and 5-fluorouracil with ongoing disease control, including 11 patients (22.9% of the overall population) who received this combination for 5 months or longer before discontinuing therapy due to disease progression or adverse events.

The adverse event profile was largely consistent with what has been reported for FOLFOX and an antiangiogenic antibody targeting VEGF [3, 5, 11]. All 48 patients (100%) experienced at least one treatment-emergent adverse event (TEAE), and 45 patients (93.8%) experienced a TEAE related to RAM. The most common ( $\geq 5\%$ ) grade 3 TEAE related to RAM was hypertension ( $n = 7$ , 14.6%). No grade 4 hypertension was reported. Other potential RAM-related TEAEs were grade 2 proteinuria (12.5%), with one case of grade 4 nephrotic syndrome, and eight epistaxis events (14.6% grade 1, 2.1% grade 2). Nine patients (18.8%) experienced infusion-related hypersensitivity reactions either during or immediately following the initial RAM infusions (all grade 1–2); eight of these nine patients were able to receive subsequent RAM without symptom recurrence with the use of premedication and/or reduced infusion rate. No grade 3 or higher infusion-related reactions were reported (Table 3).

Two patients died within 30 days of receiving a dose of the study treatment. One died due to an acute myocardial infarction after 111 days on the study, and the other had a cardiorespiratory arrest after 3 days on the study treatment. Both events were considered by the investigators as possibly related to RAM, whereas the death due to acute myocardial infarction was also considered possibly related to mFOLFOX-6 chemotherapy. Cardiotoxicity has been associated with fluoropyrimidine-containing regimens [12, 13]. Three patients had grade 3–4 venous thromboembolic events, including one patient who had grade 3 pulmonary embolism and deep vein thrombosis, one who had grade 4 pulmonary embolism, and one who had grade

3 jugular vein thrombosis in proximity to a central venous access catheter. Hematologic adverse events reported in  $\geq 10\%$  of patients are listed in Table 4.

Thirty-eight patients (79.2%) received systemic anticancer treatment after study discontinuation. The most frequently used medication was irinotecan-based therapy (66.7%); 33% of patients received subsequent bevacizumab; EGFR inhibitors (cetuximab or panitumumab) were administered to 29.2% of patients (Table 5). Two patients who did not receive systemic anticancer treatment received radiotherapy and surgery, respectively.

Pharmacokinetic, pharmacodynamic, and correlative analyses were conducted on an exploratory basis in samples collected from a subset of nine patients. Mean trough levels after repeated dosing of 8 mg/kg of RAM every 2 weeks exceeded the target concentrations associated with antitumor activity in preclinical models. Higher baseline levels of soluble Flt-1 (soluble VEGFR-1) and VEGF-A and lower baseline levels of VEGF-D appeared to be associated with longer PFS and OS. Given that this was a single-arm trial, no conclusions can be made regarding whether these potential associations may be prognostic or predictive. Conclusions are also limited by the small sample size and should be considered hypothesis generating only.

In conclusion, first-line RAM with mFOLFOX-6 was associated with a median PFS of 11.5 months in patients with mCRC. The study met the primary objective of an increase in median PFS to 11 months or longer (relative to a historical median of 8 months with FOLFOX). Secondary objectives of objective response rate (58.3%), disease control rate (93.8%), and median OS (20.4 months) suggest that RAM may enhance the efficacy of mFOLFOX-6 in mCRC. These results support ongoing randomized phase II and III investigations with RAM in mCRC. A randomized global phase III trial is under way, evaluating RAM in combination with the FOLFIRI regimen following disease progression on first-line oxaliplatin and bevacizumab therapy [14].

## Acknowledgments

We thank Ashwini Dhume and Anastasia Perkowski of ImClone Systems, a wholly-owned subsidiary of Eli Lilly and Company, for their medical writing and editorial assistance with the manuscript.

## References

1. McLeod HL, Sargent DJ, Marsh S et al. Pharmacogenetic predictors of adverse events and response to chemotherapy in metastatic colorectal cancer: Results from North American Gastrointestinal Intergroup Trial N9741. *J Clin Oncol* 2010;28:3227–3233.
2. Tournigand C, André T, Achille E et al. FOLFIRI followed by FOLFOX6 or the reverse sequence in advanced colorectal cancer: A randomized GERCOR study. *J Clin Oncol* 2004;22:229–237.
3. Hochster HS, Hart LL, Ramanathan RK et al. Safety and efficacy of oxaliplatin and fluoropyrimidine regimens with or without bevacizumab as first-line treatment of metastatic colorectal cancer: Results of the TREE study. *J Clin Oncol* 2008;26:3523–3529.
4. Giantonio BJ, Catalano PJ, Meropol NJ et al. Bevacizumab in combination with oxaliplatin, fluorouracil, and leucovorin (FOLFOX4) for previously treated metastatic colorectal cancer: Results from the Eastern Cooperative Oncology Group Study E3200. *J Clin Oncol* 2007;25:1539–1544.
5. Cassidy J, Clarke S, Díaz-Rubio E et al. XELOX vs FOLFOX-4 as first-line therapy for metastatic colorectal cancer: NO16966 updated results. *Br J Cancer* 2011;105:58–64.
6. Saltz LB, Clarke S, Díaz-Rubio E et al. Bevacizumab in combination with oxaliplatin-based chemotherapy as first-line therapy in metastatic colorectal cancer: A randomized phase III study. *J Clin Oncol* 2008;26:2013–2019.
7. Ferlay J, Shin HR, Bray F et al. Estimates of worldwide burden of cancer in 2008: GLOBOCAN 2008. *Int J Cancer* 2010;127:2893–2917.
8. Schmoll HJ, Van Cutsem E, Stein A et al. ESMO Consensus Guidelines for management of patients with colon and rectal cancer. A personalized approach to clinical decision making. *Ann Oncol* 2012;23:2479–2516.
9. Hecht JR, Trarbach T, Hainsworth JD et al. Randomized, placebo-controlled, phase III study of first-line oxaliplatin-based chemotherapy plus PTK787/ZK 222584, an oral vascular endothelial growth factor receptor inhibitor, in patients with metastatic colorectal adenocarcinoma. *J Clin Oncol* 2011;29:1997–2003.
10. Saltz L, Clarke S, Diaz-Rubio E et al. Bevacizumab (Bev) in combination with XELOX or FOLFOX4: Updated efficacy results from XELOX-1/NO16966, a randomized phase III trial in first-line metastatic colorectal cancer. *J Clin Oncol* 2007;25(suppl):4028a.
11. Takahari D, Yamada Y, Matsumoto H et al. A randomized phase III trial of S-1/oxaliplatin (SOX) plus bevacizumab versus 5-FU/I-LV/oxaliplatin (mFOLFOX6) plus bevacizumab in patients with metastatic colorectal cancer: The SOFT study. *J Clin Oncol* 2013;31(suppl):3519a.
12. Wacker A, Lersch C, Scherpinski U et al. High incidence of angina pectoris in patients treated with 5-fluorouracil. A planned surveillance study with 102 patients. *Oncology* 2003;65:108–112.
13. Keefe DL, Roistacher N, Pierri MK. Clinical cardiotoxicity of 5-fluorouracil. *J Clin Pharmacol* 1993;33:1060–1070.
14. A study in second line metastatic colorectal cancer. Available at <http://clinicaltrials.gov/ct2/show/NCT01183780?term=NCT01183780&rank=1>. Accessed September 20, 2013.

## Figures and Tables

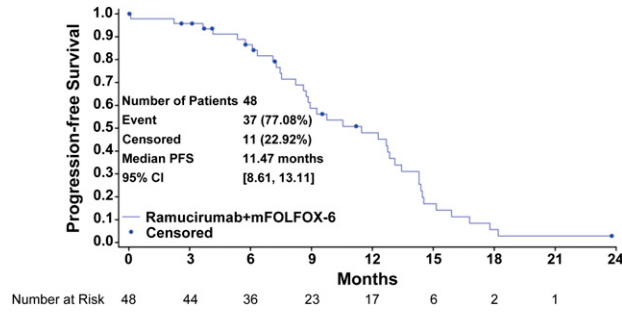

**Figure 1.** Progression-free survival curve: Kaplan-Meier plot for progression-free survival for all patients.  
Abbreviations: CI, confidence interval; mFOLFOX-6, modified FOLFOX-6 regimen; PFS, progression-free survival.

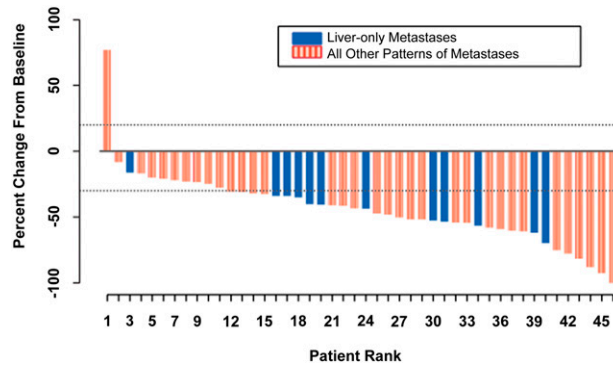

**Figure 2.** Waterfall plot of best percentage change from baseline in size of target tumor lesions. Best change in target-lesion size is maximum reduction from baseline or minimum increase in absence of reduction.

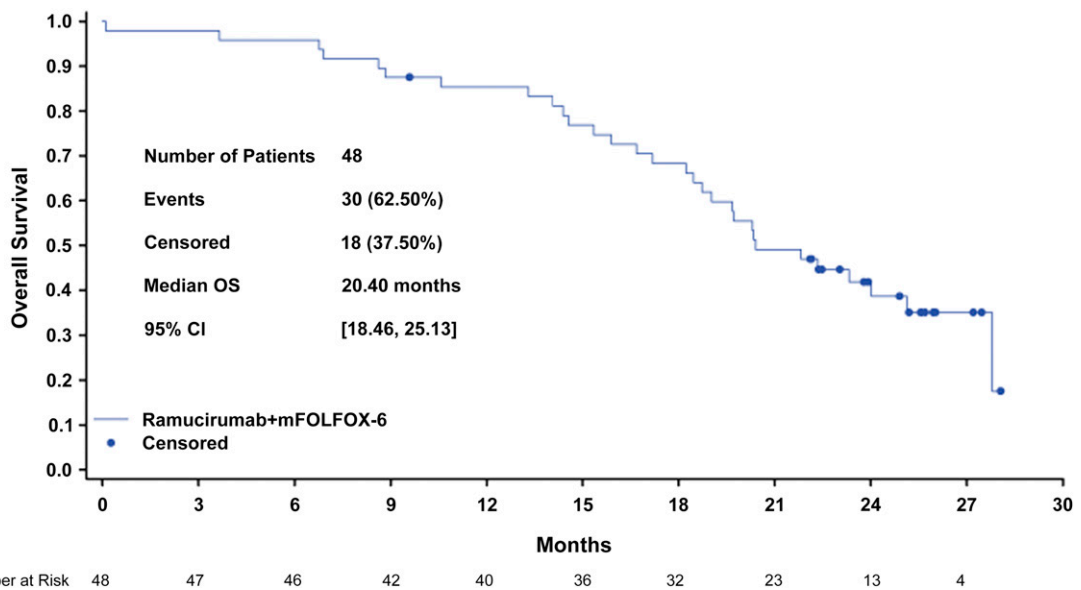

**Figure 3.** Overall survival curve: Kaplan-Meier plot for overall survival for all patients.  
Abbreviations: CI, confidence interval; mFOLFOX-6, modified FOLFOX-6 regimen; OS, overall survival.

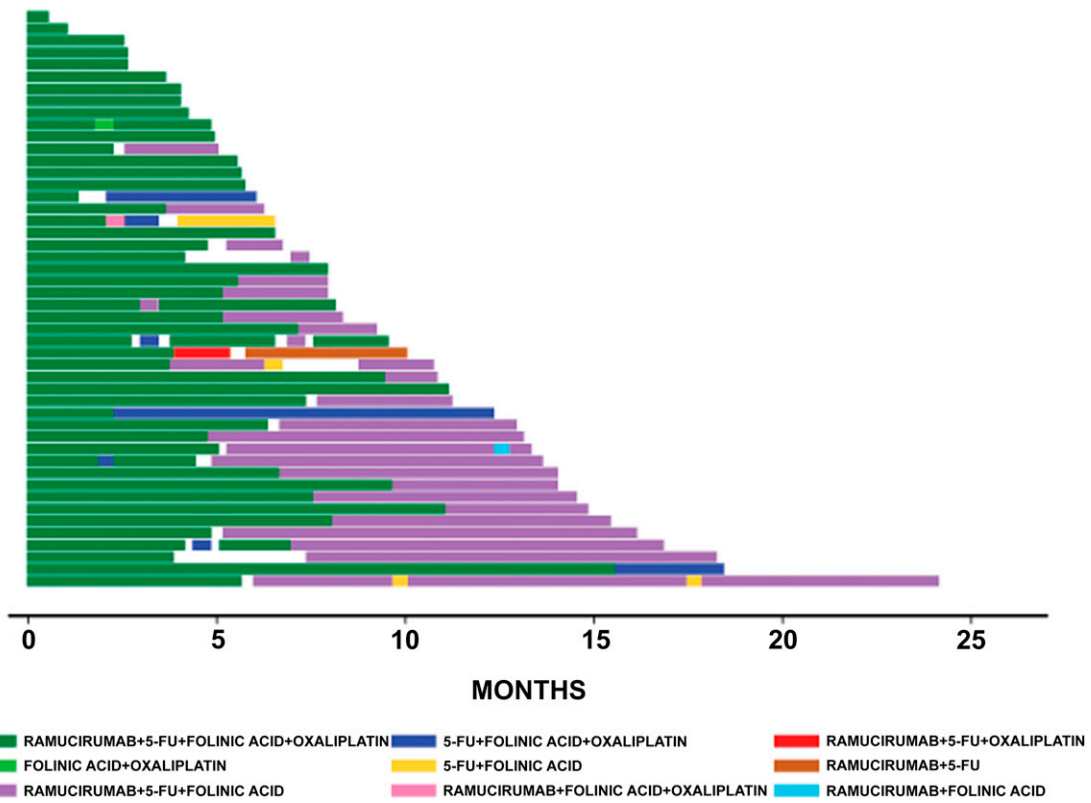

**Figure 4.** Treatment exposure.  
Abbreviation: 5-FU, 5-fluorouracil.

**Table 1.** Baseline patient characteristics

| Characteristic                               | <i>n</i> | %            |
|----------------------------------------------|----------|--------------|
| Number of patients                           |          |              |
| Enrolled                                     | 48       |              |
| Treated, ITT population                      | 48       | 100.0        |
| On study therapy as of August 2011           | 0        |              |
| Off study therapy as of August 2011          | 48       | 100.0        |
| Gender                                       |          |              |
| Male                                         | 25       | 52.1         |
| Female                                       | 23       | 47.9         |
| Age (years)                                  |          |              |
| 18 to <65                                    | 31       | 64.6         |
| ≥65                                          | 17       | 35.4         |
| Median age (range)                           |          | 60.5 (28–81) |
| ECOG PS                                      |          |              |
| 0                                            | 30       | 62.5         |
| 1                                            | 18       | 37.5         |
| Type of cancer                               |          |              |
| Colon                                        | 32       | 66.7         |
| Colorectal                                   | 7        | 14.6         |
| Rectal                                       | 9        | 18.8         |
| Metastases                                   |          |              |
| Patients with metastases                     | 48       | 100.0        |
| Patients with liver-only metastases          | 13       | 27.1         |
| Patients with lung-only metastases           | 1        | 2.1          |
| Site of metastatic disease (>5%)             |          |              |
| Liver                                        | 38       | 79.2         |
| Lung                                         | 17       | 35.4         |
| Lymph nodes (abdomen)                        | 14       | 29.2         |
| Peritoneal                                   | 11       | 22.9         |
| Lymph nodes (thoracic)                       | 9        | 18.8         |
| Gastrointestinal tract                       | 3        | 6.3          |
| Other <sup>a</sup>                           | 7        | 14.6         |
| Number of metastatic sites (involved organs) |          |              |
| 1                                            | 17       | 35.4         |
| ≥2                                           | 31       | 64.6         |
| Previous surgery                             |          |              |
| Yes                                          | 33       | 68.8         |
| No                                           | 15       | 31.3         |
| Prior adjuvant therapy                       |          |              |
| Chemotherapy                                 | 5        | 10.4         |
| Radiotherapy                                 | 2        | 4.2          |
| Comorbidities                                |          |              |
| Patients with prior hypertension             | 22       | 45.8         |

All percentages may not add up to 100% due to rounding.

<sup>a</sup>Other sites of metastatic disease included soft tissue, spleen, pleura, lymph nodes (cervical and other), and pelvis.

Abbreviations: ECOG PS, Eastern Cooperative Oncology Group performance status; ITT, intention to treat.



**Table 2.** Best overall response, disease control rate, objective response rate, and progression-free survival

| Result                              | Ramucirumab + mFOLFOX-6 (N = 48) |                  |
|-------------------------------------|----------------------------------|------------------|
|                                     | n                                | %                |
| Best overall response               |                                  |                  |
| CR                                  | 1                                | 2.1              |
| PR                                  | 27                               | 56.3             |
| SD                                  | 17                               | 35.4             |
| PD                                  | 1                                | 2.1              |
| Not evaluable                       | 2                                | 4.2              |
| Disease control rate (CR + PR + SD) | 45                               | 93.8             |
| 95% CI                              |                                  | (82.8–98.7)      |
| Objective response rate (CR + PR)   | 28                               | 58.3             |
| 95% CI                              |                                  | (43.2–72.4)      |
| Progression-free survival           |                                  |                  |
| Median, months (95% CI)             |                                  | 11.5 (8.6–13.1)  |
| 1-year rate, % (95% CI)             |                                  | 48.0 (31.9–62.5) |

Abbreviations: CI, confidence interval; CR, complete response; PD, progressive disease; PR, partial response; SD, stable disease.

**Table 3.** Incidence and severity of treatment-emergent adverse events (reported in at least 10% of patients)

| Preferred term                | Ramucirumab + mFOLFOX-6 (N = 48) |                |                |
|-------------------------------|----------------------------------|----------------|----------------|
|                               | All grades, n (%)                | Grade 3, n (%) | Grade 4, n (%) |
| Fatigue                       | 38 (79.2)                        | 6 (12.5)       | 0              |
| Asthenia                      | 35 (72.9)                        | 6 (12.5)       | 0              |
| Fatigue                       | 4 (8.3)                          | 0              | 0              |
| Neuropathy                    | 31 (64.6)                        | 6 (12.5)       | 0              |
| Dysesthesia                   | 23 (47.9)                        | 4 (8.3)        | 0              |
| Paresthesia                   | 7 (14.6)                         | 1 (2.1)        | 0              |
| Peripheral neuropathy         | 5 (10.4)                         | 1 (2.1)        | 0              |
| Peripheral sensory neuropathy | 5 (10.4)                         | 0              | 0              |
| Hypoesthesia                  | 3 (6.3)                          | 0              | 0              |
| Abdominal pain                | 16 (33.3)                        | 0              | 0              |
| Abdominal pain                | 14 (29.2)                        | 0              | 0              |
| Abdominal pain upper          | 2 (4.2)                          | 0              | 0              |

Grade 5 events were progressive disease, acute myocardial infarction, and cardiorespiratory arrest, each reported in one treated patient (detailed below). Fatigue, neuropathy, and abdominal pain are presented as consolidated adverse events terms in addition to the specific MedDRA terms based on investigator reporting; both consolidated and MedDRA terms are indicated.

**Table 4.** Incidence and severity of hematologic adverse events (reported in at least 10% of patients)

| Preferred term   | Ramucirumab + mFOLFOX-6 (N = 48) |                |                |                |                |
|------------------|----------------------------------|----------------|----------------|----------------|----------------|
|                  | All grades, n (%)                | Grade 1, n (%) | Grade 2, n (%) | Grade 3, n (%) | Grade 4, N (%) |
| Neutropenia      | 27 (56.3)                        | 1 (2.1)        | 6 (12.5)       | 16 (33.3)      | 4 (8.3)        |
| Thrombocytopenia | 17 (35.4)                        | 6 (12.5)       | 10 (20.8)      | 1 (2.1)        | 0              |
| Anemia           | 8 (16.7)                         | 5 (10.4)       | 1 (2.1)        | 2 (4.2)        | 0              |
| Leukopenia       | 8 (16.7)                         | 1 (2.1)        | 6 (12.5)       | 1 (2.1)        | 0              |

Note: One patient (2.1%) experienced a grade 4 febrile neutropenia.

**Table 5.** Summary of poststudy anticancer systemic therapy: all treated patients

| Poststudy therapy                                                                               | Ramucirumab + mFOLFOX-6 (N = 48) |      |
|-------------------------------------------------------------------------------------------------|----------------------------------|------|
|                                                                                                 | <i>n</i>                         | %    |
| Any treatment <sup>a</sup>                                                                      | 38                               | 79.2 |
| Irinotecan-based therapy                                                                        | 32                               | 66.7 |
| Bevacizumab                                                                                     | 16                               | 33.3 |
| EGFR inhibitors <sup>b</sup>                                                                    | 14                               | 29.2 |
| Other agents <sup>c</sup>                                                                       | 10                               | 20.8 |
| Oxaliplatin-based therapy                                                                       | 5                                | 10.4 |
| Fluoropyrimidines without subsequent irinotecan/oxaliplatin (5-fluorouracil, capecitabine, UFT) | 3                                | 6.3  |

<sup>a</sup>Excludes two patients who received only radiotherapy and surgery.

<sup>b</sup>Cetuximab and panitumumab.

<sup>c</sup>Raltitrexed, mitomycin, investigational drugs.

[Click here](#) to access other published clinical trials.
